# Supplementary material
Source: MDPI journal article supplement (https://www.mdpi.com/1424-2818/13/5/213)
Supplement: s1 [file s1]

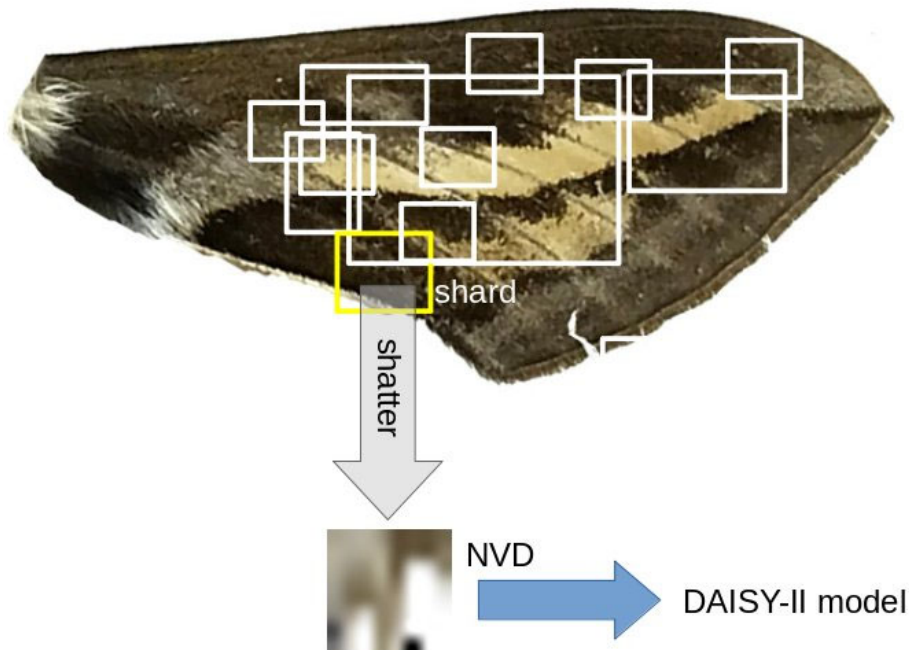

**Figure S1. Illustration of how ‘characters’ at multiple spatial scales are generated.** A pre-processor, shatter, samples the wing stochastically at multiple scales and locations within the image (white boxes). The material sampled (the ‘shards’) are then converted into pseudo-images called NVDs; these are unique reduced dimensionality ‘signatures’ for each shard that are then used by DAISY-II to build its (PSOM) neural network.

|                                     |                                      |   |
|-------------------------------------|--------------------------------------|---|
| Hyles-livornica-A.b9aea381f7010d7f  | Hyles-gallii-MF1.12f7f0e3d599743     | 1 |
| Hyles-nicaea-A.e4116d9100635d24     | Hyles-gallii-MF1.12f7f0e3d599743     | 1 |
| Hyles-hippophaes-A.e74853f789038a0f | Hyles-gallii-MF2.12f7f0e3d599743     | 1 |
| Hyles-hippophaes-A.e74853f789038a0f | Hyles-gallii-MF1.12f7f0e3d599743     | 1 |
| Hyles-livornica-A.7402f1cdbc228685  | Hyles-gallii-MF1.12f7f0e3d599743     | 1 |
| Hyles-hippophaes-A.320fceffbf2d378a | Hyles-gallii-MF1.12f7f0e3d599743     | 1 |
| Hyles-hippophaes-A.e74853f789038a0f | Hyles-gallii-MF1.12f7f0e3d599743     | 1 |
| Hyles-livornica-A.d5106ca97fc12ddf  | Hyles-gallii-MF1.12f7f0e3d599743     | 1 |
| Hyles-hippophaes-A.9a60a2b38b880de1 | Hyles-gallii-MF1.12f7f0e3d599743     | 1 |
| Hyles-livornica-A.8c7a04af9a9b0222  | Hyles-gallii-MF5.12f7f0e3d599743     | 1 |
| Hyles-livornica-A.69e4906ae5cdd52d  | Hyles-gallii-MF2.12f7f0e3d599743     | 1 |
| Hyles-livornica-A.2d1637f14795da18  | Hyles-gallii-MF1.12f7f0e3d599743     | 1 |
| Hyles-hippophaes-A.9a60a2b38b880de1 | Hyles-gallii-MF1.12f7f0e3d599743     | 1 |
| Hyles-nicaea-A.e4116d9100635d24     | Hyles-gallii-MF1.12f7f0e3d599743     | 1 |
| Hyles-livornica-A.2d1637f14795da18  | Hyles-gallii-MF1.12f7f0e3d599743     | 1 |
| Hyles-hippophaes-A.de6b107ea83f1610 | Hyles-hippophaes-MP1.469e8859d3a0067 | 1 |
| Hyles-livornica-A.d5106ca97fc12ddf  | Hyles-gallii-MF1.12f7f0e3d599743     | 1 |

**Figure S2. Portion of binary rule-set produced by DAISY-II.** This is used to build the character association matrix, which is then used by the inflater for force-placement optimisation.

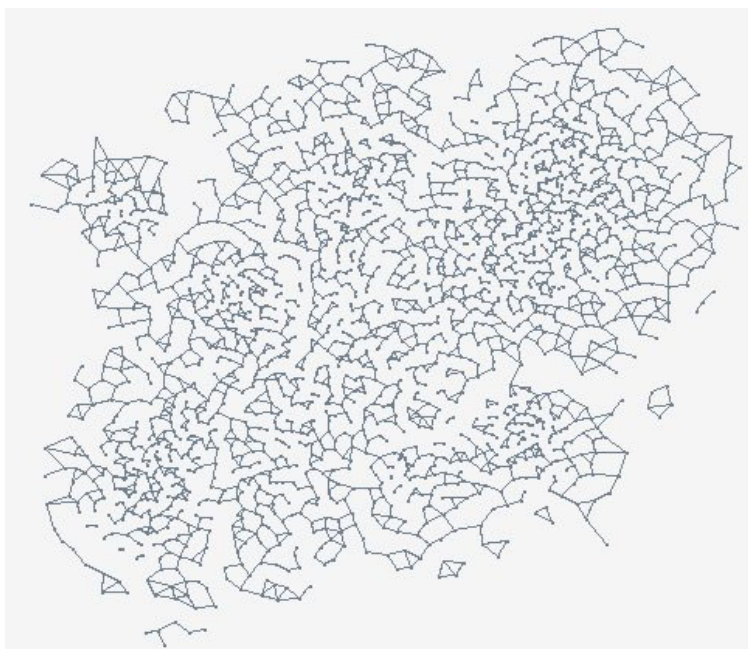

**Figure S3. Example of an optimal, self consistent 2D morph-space visualisation produced by the inflater.** A line segment between (NVD) image-characters indicates that the association between them is strong and that they are 1<sup>st</sup>, 2<sup>nd</sup> or 3<sup>rd</sup> nearest neighbours in R2 (2D space).

**Table S1. Samples included in Whole Genome In Solution Capture (WISC) Sequencing**

| MTD-TW<br>Voucher code. | Taxon                                | Country    | Site                                                                                                      | Elevation | Collection<br>Day | Collection<br>Month | Collection<br>Year | Collected by           | Collection / Storage                                      |
|-------------------------|--------------------------------------|------------|-----------------------------------------------------------------------------------------------------------|-----------|-------------------|---------------------|--------------------|------------------------|-----------------------------------------------------------|
| 11578                   | <i>Hyles chamyla</i><br>"f. apocyni" | Tajikistan | 30 km W Shartuz (Shahrtuz, Shaartuz, Shahrituz town) , Amu-Darya river                                    | 300       | 28                | 6                   | 1994               | V.&A.Lukhtanov         | U. Eitschberger collection, Marktleuthen, Germany         |
| 11580                   | <i>Hyles chamyla</i><br>"f.apocyni"  | Tajikistan | Amu-Darya river, 35-40 km W Shartuz                                                                       | 300       | 28                | 7                   | 1994               | Lukhtanov              | U. Eitschberger collection, Marktleuthen, Germany         |
| 11581                   | <i>Hyles chamyla</i><br>"f.apocyni"  | Tajikistan | Amu-Darya river, 35-40 km W Shartuz                                                                       | 300       | 28                | 8                   | 1994               | Lukhtanov              | U. Eitschberger collection, Marktleuthen, Germany         |
| 11941                   | <i>Hyles chamyla</i><br>"f.apocyni"  | China      | Xinjiang, SW from Kashi, W Taklimakan desert, Terembazar                                                  | 1200      | 7                 | 6                   | 2013               | Floriani               | U. Eitschberger collection, Marktleuthen, Germany         |
| 11951                   | <i>Hyles chamyla</i><br>"f.apocyni"  | Kyrgyzstan | Inn. Tian Shan, Naryn river valley, Kazarman village                                                      | 1250      | 21                | 7                   | 2000               | S.Churkin              | U. Eitschberger collection, Marktleuthen, Germany         |
| 11952                   | <i>Hyles chamyla</i><br>"f.apocyni"  | China      | Xinjiang region, W Taklimakan (Taklamakan) desert, Yarkan He (Yarkant/Yarkand) river valley, Tugay forest | 1140      | 9-12              | 6                   | 2013               | Floriani; U.           | U. Eitschberger collection, Marktleuthen, Germany         |
| 11966                   | <i>Hyles chamyla</i><br>"f.apocyni"  | Tajikistan | Shugnansky Mts., 2,5 km SW of Kishlak Vodzh                                                               | 2670      | 16                | 7                   | 2011               | S.K.Korb               | U. Eitschberger collection, Marktleuthen, Germany         |
| 12148                   | <i>Hyles chamyla</i><br>"f.apocyni"  | Tajikistan | Khatlon Vakhsh river, Tigrovaja balka reserve                                                             | 330       | 20                | 5                   | 2017               | B.Benedek &S.Ilniczky  | Senckenberg Natural History Collections, Dresden, Germany |
| 12221                   | <i>Hyles chamyla</i><br>"f.apocyni"  | Tajikistan | Vakhshkaja dolina valley, Molotovobad village region, 6-th village, Khatlon region, Dusti distr.          | 380       | 25                | 8                   | 1953               | leg. Ju. Shchetkin     | Zoological Institute, Saint-Petersburg, Russia            |
| 12284                   | <i>Hyles chamyla</i><br>"f.apocyni"  | Tajikistan | S Tajikistan, Khatlon region, Tigrovaja balka natural reserve                                             | 335       | 23-24             | 7                   | 1988               | V.V. Dubatolov         |                                                           |
| 1728                    | <i>Hyles chamyla</i><br>"f.apocyni"  | Tajikistan | Tigrovaja balka nature reserve                                                                            | 335       | 10                | 8                   | 2000               | via Dr.Ronald Brechlin | R. Brechlin, Pasewalk, Germany, local coll.               |
| 9298                    | <i>Hyles chamyla</i><br>"f.apocyni"  | Tajikistan | Tigrovaja balka nature reserve                                                                            | 335       | 16-20             | 5                   | 1999               | A.Bergmann             | Spingidae Museum, Pribram, Czech Republic                 |

|      |                                     |              |                                                                       |      |       |   |      |              |                                                                                                                                                   |
|------|-------------------------------------|--------------|-----------------------------------------------------------------------|------|-------|---|------|--------------|---------------------------------------------------------------------------------------------------------------------------------------------------|
| 9299 | <i>Hyles chamyla</i><br>"f.apocyni" | Tajikistan   | Tigrovaja balka nature reserve                                        | 335  | 12-18 | 5 | 1999 | A.Bergmann   | Sphingidae Museum,<br>Pribram, Czech Republic                                                                                                     |
| 9300 | <i>Hyles chamyla</i><br>"f.apocyni" | Tajikistan   | Tigrovaja balka nature reserve                                        | 335  | 5-25  | 4 | 2000 | A.Bergmann   | Sphingidae Museum,<br>Pribram, Czech Republic                                                                                                     |
| 1726 | <i>Hyles chamyla</i><br>"f.chamyla" | Mongolia     | Gobi Altay aimak (province), Zahuin Gobi                              | 1000 | 6     | 6 | 2004 | A.Saldaitis  | R. Brechlin, Pasewalk,<br>Germany, local coll.                                                                                                    |
| 9144 | <i>Hyles chamyla</i><br>"f.chamyla" | Mongolia     | SW Mongolia, Gobi-Altai aimak, 43 km S Bugat,<br>2 km N Alag-Nur lake | 1060 | 26-28 | 6 | 2017 | R.V.Yakovlev | R.V. Yakovlev collection,<br>Barnaul, Russia                                                                                                      |
| 9152 | <i>Hyles chamyla</i><br>"f.chamyla" | Mongolia     | SW Mongolia, Gobi-Altai aimak, 43 km S Bugat,<br>2 km N Alag-Nur lake | 1060 | 26-28 | 6 | 2017 | R.V.Yakovlev | R.V. Yakovlev collection,<br>Barnaul, Russia                                                                                                      |
| 9186 | <i>Hyles chamyla</i><br>"f.chamyla" | Mongolia     | SW Mongolia, Gobi-Altai aimak, Dzhungarian<br>Gobi, Alag-Nuur lake    | 1200 | 9-10  | 7 | 2010 | R.Yakovlev   | R.V. Yakovlev collection,<br>Barnaul, Russia                                                                                                      |
| 9187 | <i>Hyles chamyla</i><br>"f.chamyla" | Mongolia     | SW Mongolia, Gobi-Altai aimak, Dzhungarian<br>Gobi, Alag-Nuur lake    | 1200 | 1-2   | 6 | 2011 | R.Yakovlev   | R.V. Yakovlev collection,<br>Barnaul, Russia                                                                                                      |
| 9251 | <i>Hyles chamyla</i><br>"f.chamyla" | Turkmenistan | Merv (Merw, east of the Caspian Sea)                                  | 230  | -     | - | -    |              | Museum für Naturkunde,<br>Leibnitz-Institut für<br>Evolution- und<br>Biodiversitätsforschung an<br>der Humboldt-Universität zu<br>Berlin, Germany |
|      |                                     |              |                                                                       | 230  |       |   |      |              | Museum für Naturkunde,<br>Leibnitz-Institut für<br>Evolution- und<br>Biodiversitätsforschung an<br>der Humboldt-Universität zu<br>Berlin, Germany |
| 9252 | <i>Hyles chamyla</i><br>"f.chamyla" | Turkmenistan | Merv (Merw, east of the Caspian Sea)                                  | 760  | -     | - | 1908 | Püngeler?    | Museum für Naturkunde,<br>Leibnitz-Institut für<br>Evolution- und<br>Biodiversitätsforschung an<br>der Humboldt-Universität zu<br>Berlin, Germany |
| 9253 | <i>Hyles chamyla</i><br>"f.chamyla" | China        | Chamil (Kumul)/Ham                                                    |      | -     | - | 1908 | Rückbeil?    | Museum für Naturkunde,<br>Leibnitz-Institut für<br>Evolution- und<br>Biodiversitätsforschung an<br>der Humboldt-Universität zu<br>Berlin, Germany |

|       |                                        |          |                                                           |      |       |   |      |                           |  |                                                                                                                                                   |
|-------|----------------------------------------|----------|-----------------------------------------------------------|------|-------|---|------|---------------------------|--|---------------------------------------------------------------------------------------------------------------------------------------------------|
|       |                                        |          |                                                           | 760  |       |   |      |                           |  | Museum für Naturkunde,<br>Leibnitz-Institut für<br>Evolution- und<br>Biodiversitätsforschung an<br>der Humboldt-Universität zu<br>Berlin, Germany |
| 9254  | <i>Hyles chamyla</i><br>"f.chamyla"    | China    | Chamil (Kumul)/Hami                                       |      | -     | - | 1913 | Denso?                    |  |                                                                                                                                                   |
| 11308 | <i>Hyles hippophaes<br/>baltistana</i> | Pakistan | Karakorum Mts., Naltar valley                             | 2880 | 26-27 | 6 | 2014 | B. Benedek & J.<br>Babics |  | Bavarian State Collection of<br>Zoology, Munich, Germany                                                                                          |
| 11309 | <i>Hyles hippophaes<br/>baltistana</i> | Pakistan | Karakorum Mts., Naltar valley                             | 2880 | 26-27 | 6 | 2014 | B. Benedek & J<br>.Babics |  | Bavarian State Collection of<br>Zoology, Munich, Germany                                                                                          |
| 12438 | <i>Hyles hippophaes<br/>baltistana</i> | India    | Himachal Pradesh Spiti, Spiti Valley, Kaza                | 3550 | 3     | 7 | 1994 | P. Kautt & V.<br>Weisz    |  | Museum Witt, München,<br>Germany                                                                                                                  |
| 12439 | <i>Hyles hippophaes<br/>baltistana</i> | India    | Himachal Pradesh Spiti, Spiti valley, Kaza                | 3550 | 13    | 7 | 1994 | P. Kautt & V.<br>Weisz    |  | Museum Witt, München,<br>Germany                                                                                                                  |
|       |                                        |          |                                                           | 3160 |       |   |      |                           |  | Museum für Naturkunde,<br>Leibnitz-Institut für<br>Evolution- und<br>Biodiversitätsforschung an<br>der Humboldt-Universität zu<br>Berlin, Germany |
| 9267  | <i>Hyles hippophaes<br/>baltistana</i> | Pakistan | Hushey (Hushe) valley, Central Karakoram<br>national park |      | 4     | 7 | 2013 | -                         |  |                                                                                                                                                   |
|       |                                        |          |                                                           | 2880 |       |   |      |                           |  | Museum für Naturkunde,<br>Leibnitz-Institut für<br>Evolution- und<br>Biodiversitätsforschung an<br>der Humboldt-Universität zu<br>Berlin, Germany |
| 9287  | <i>Hyles hippophaes<br/>baltistana</i> | Pakistan | Karakoram Mts, Naltar valley                              |      | 26-27 | 6 | 2014 | B. Benedek & J<br>Babies  |  |                                                                                                                                                   |
|       |                                        |          |                                                           | 2200 |       |   |      |                           |  | Museum für Naturkunde,<br>Leibnitz-Institut für<br>Evolution- und<br>Biodiversitätsforschung an<br>der Humboldt-Universität zu<br>Berlin, Germany |
| 9288  | <i>Hyles hippophaes<br/>baltistana</i> | Pakistan | Pakistan, Karakoram Mts., Chaprot village                 |      | 29    | 6 | 2014 | B. Benedek & J.<br>Babies |  |                                                                                                                                                   |

|       |                                    |              |                                                                                                |      |      |   |      |                                       |                                                                                                                                     |
|-------|------------------------------------|--------------|------------------------------------------------------------------------------------------------|------|------|---|------|---------------------------------------|-------------------------------------------------------------------------------------------------------------------------------------|
|       |                                    |              |                                                                                                | 2200 |      |   |      |                                       |                                                                                                                                     |
| 9289  | <i>Hyles hippophaes baltistana</i> | Pakistan     | Pakistan, Karakoram Mts., Chaprot village                                                      |      | 29   | 6 | 2014 | B. Benedek & J. Babies                | Museum für Naturkunde, Leibnitz-Institut für Evolutions- und Biodiversitätsforschung an der Humboldt-Universität zu Berlin, Germany |
| 11552 | <i>Hyles hippophaes bienerti</i>   | Turkey       | Nevsehir municipality, Göreme                                                                  | 1120 | 1    | 8 | 1990 | Kautt                                 | U. Eitschberger collection, Marktleuthen, Germany                                                                                   |
| 11553 | <i>Hyles hippophaes bienerti</i>   | Turkey       | 4 km E from Nevsehir                                                                           | 1250 | 22   | 6 | 1979 | Groß                                  | U. Eitschberger collection, Marktleuthen, Germany                                                                                   |
| 11554 | <i>Hyles hippophaes bienerti</i>   | Armenia      | Aragadzor                                                                                      | 1170 | 18   | 6 | 1997 | U. Eitschberger                       | U. Eitschberger collection, Marktleuthen, Germany                                                                                   |
| 11555 | <i>Hyles hippophaes bienerti</i>   | Turkmenistan | Kopetdag Mts., Garrygala (Magtymguly) city                                                     | 330  | 1    | 7 | 1996 | V .Perepel                            | U. Eitschberger collection, Marktleuthen, Germany                                                                                   |
| 11557 | <i>Hyles hippophaes bienerti</i>   | Iran         | Prov. Teheran, Alborz Mts., Damavand Mt, 15 km NE from Lar-e Polur                             | 1700 | 1-2  | 7 | 2000 | Gy. Fábíán, L. Szécsényi & K. Székely | U. Eitschberger collection, Marktleuthen, Germany                                                                                   |
| 11963 | <i>Hyles hippophaes bienerti</i>   | Kyrgyzstan   | Narün (Naryn) region, Ak-Tala district, Ak-Tal-Tschat (Ak-Tal-Chat)                            | 1640 | 1    | 7 | 1996 | V. Lukhtanov                          | U. Eitschberger collection, Marktleuthen, Germany                                                                                   |
| 11966 | <i>Hyles hippophaes bienerti</i>   | Tajikistan   | Shugnansky Mts., 2,5km SW of kishlak Vodzh                                                     | 2670 | 16   | 7 | 2011 | U. Eitschberger                       | U. Eitschberger collection, Marktleuthen, Germany                                                                                   |
| 11967 | <i>Hyles hippophaes bienerti</i>   | Tajikistan   | S Tadjikistan: Tigrovaja balka (Tiger gully) nature reserve, down stream of Pianj (Panj) river | 320  | 1-5  | 8 | 2006 | V.Gurko                               | U. Eitschberger collection, Marktleuthen, Germany                                                                                   |
| 11968 | <i>Hyles hippophaes bienerti</i>   | Kyrgyzstan   | NE Fergansky Mts., 10 km SW Atai (Atay) village, East Kugart (Kek Art, Kökart) river           | 1860 | 16   | 7 | 2000 | S.Churkin                             | U. Eitschberger collection, Marktleuthen, Germany                                                                                   |
| 11969 | <i>Hyles hippophaes bienerti</i>   | Tajikistan   | Darvaz Mts., near Tavildara vill. (town)                                                       | 1710 | 9-18 | 8 | 2006 | V.Gurko                               | U. Eitschberger collection, Marktleuthen, Germany                                                                                   |
| 11972 | <i>Hyles hippophaes baltistana</i> | China        | Oueho, Altun Shan (Altyn Tagh)                                                                 | 2000 | 28   | 7 | 1996 | Eitschberger                          | U. Eitschberger collection, Marktleuthen, Germany                                                                                   |

|       |                                    |              |                                                                                                                         |      |       |   |      |                              |                                                           |
|-------|------------------------------------|--------------|-------------------------------------------------------------------------------------------------------------------------|------|-------|---|------|------------------------------|-----------------------------------------------------------|
| 11977 | <i>Hyles hippophaes baltistana</i> | Russia       | Volgograd region, Don river, Kamyshinka                                                                                 | 70   | 11    | 8 | 2001 | V. Lukhtanov & A. Dantchenko | U. Eitschberger collection, Marktleuthen, Germany         |
| 11978 | <i>Hyles hippophaes bienerti</i>   | Kyrgyzstan   | (Border with Tajikistan), Alai-Kette, Kara-Myk                                                                          | 2270 |       | 7 | 1995 | V. Lukhtanov                 | U. Eitschberger collection, Marktleuthen, Germany         |
| 11979 | <i>Hyles hippophaes bienerti</i>   | Kyrgyzstan   | Transalai (Transalay)-mountain chain (W), Schibe (Shibe) community                                                      | 2410 | 17-19 | 7 | 1995 | V. Lukhtanov                 | U. Eitschberger collection, Marktleuthen, Germany         |
| 11984 | <i>Hyles hippophaes bienerti</i>   | Kazakhstan   | Nurly village, Ily (Ili) river valley                                                                                   | 550  | 25-26 | 6 | 2002 | M.Danilevsky                 | Senckenberg Natural History Collections, Dresden, Germany |
| 11989 | <i>Hyles hippophaes bienerti</i>   | Russia       | South Tuva Republic (Tyva), southern edge of Tannuola (Tannu-Ola) range, 30 km SW Samagaltai, Tes-Khen (Tes-Chem) river | 950  | 21    | 6 | 2001 | R. Yakovlev,                 | U. Eitschberger collection, Marktleuthen, Germany         |
| 11990 | <i>Hyles hippophaes bienerti</i>   | Russia       | South Tuva Republic (Tyva), Erzin Distr., Ubsunur (Uvs Nuur) State Reserve, south bank of Lake Tore-Kholj (Tore-Chol)   | 1230 | 21-22 | 6 | 2002 | R. Yakovlev, Germany         | U. Eitschberger collection, Marktleuthen, Germany         |
| 12406 | <i>Hyles hippophaes bienerti</i>   | Turkmenistan | SW Turkmenistan, Kopetdag Mts., Garygala (Magtymguly) env.                                                              | 330  | 1     | 6 | 1995 | J. Miatleuski                | U. Eitschberger collection, Marktleuthen, Germany         |
| 12409 | <i>Hyles hippophaes bienerti</i>   | China        | Queho, Altun Shan Mts.                                                                                                  | 2000 | 28    | 7 | 1996 | -                            | Collection M. Ströhle, Weiden, Germany                    |
| 12410 | <i>Hyles hippophaes bienerti</i>   | Kazakhstan   | West Kazakhstan, Ryn-kum sandy steppe, Dz hailau loc.                                                                   | -15  | 25    | 6 | 1999 | V. Karalius & I. Miatleuski  | Collection M. Ströhle, Weiden, Germany                    |
| 12412 | <i>Hyles hippophaes bienerti</i>   | China        | Queho, Altun Shan Mts.                                                                                                  | 2000 | 28    | 7 | 1996 | -                            | Collection M. Ströhle, Weiden, Germany                    |
| 12414 | <i>Hyles hippophaes bienerti</i>   | Kazakhstan   | West Kazakhstan, Ryn-kum sandy steppe, Dz hailau loc.                                                                   | -15  | 25    | 6 | 1999 | V. Karalius & I. Miatleuski  | Collection M. Ströhle, Weiden, Germany                    |
| 12415 | <i>Hyles hippophaes bienerti</i>   | Turkmenistan | SW Turkmenistan, Kopetdag Mts., Garygala (Magtymguly) env.                                                              | 330  | 26-27 | 6 | 1995 | J. Miatleuski                | Collection M. Ströhle, Weiden, Germany                    |

|       |                                  |              |                                                                                                  |      |       |   |      |                                                  |                                                                          |
|-------|----------------------------------|--------------|--------------------------------------------------------------------------------------------------|------|-------|---|------|--------------------------------------------------|--------------------------------------------------------------------------|
| 12436 | <i>Hyles hippophaes bienerti</i> | Turkmenistan | Kopet-Dagh Mts., valley of the rivers Ipay-Kala and Point-Kala                                   | 130  | 30    | 6 | 1992 | Gy. Fabian, B. Herczig, A. Podlussany & Z. Varga | Hungarian Natural History Museum, Budapest, Hungary                      |
| 12441 | <i>Hyles hippophaes bienerti</i> | China        | Daban Shan, Xining                                                                               | 2300 | 8     | 8 | 1996 | -                                                | Museum Witt, München, Germany                                            |
| 12719 | <i>Hyles hippophaes bienerti</i> | Iran         | Farab                                                                                            | 1290 | 15    | 4 | 1910 | L. Sheljuzhko                                    | Zoological Museum, Taras Shevchenko National University of Kiev, Ukraine |
| 12720 | <i>Hyles hippophaes bienerti</i> | Tajikistan   | W Pamir Mts., Chorag (Khorugh) town, Shugnan (Shighnan) province, at the boundary to Afghanistan | 2100 | -     |   |      | ZMKU Kiev                                        | Zoological Museum, Taras Shevchenko National University of Kiev, Ukraine |
| 12721 | <i>Hyles hippophaes bienerti</i> | Tajikistan   | W Pamir Mts., Chorag (Khorugh) town, Shugnan (Shighnan) province, at the boundary to Afghanistan | 2100 | -     |   |      | ZMKU Kiev                                        | Zoological Museum, Taras Shevchenko National University of Kiev, Ukraine |
| 4381  | <i>Hyles hippophaes bienerti</i> | Russia       |                                                                                                  |      | -     |   |      | Gary Saunders                                    | Senckenberg Natural History Collections, Dresden, Germany                |
| 9129  | <i>Hyles hippophaes bienerti</i> | Kazakhstan   | S Kazakhstan, Ili river valley near Koktal bridge                                                | 510  | 1     | 7 | 2012 | S. Rybalkin & R. Yakovlev                        | R.V. Yakovlev collection, Barnaul, Russia                                |
| 9131  | <i>Hyles hippophaes bienerti</i> | Russia       | S. Siberia, Altaj region, Mikhajlovskoe distr., 5 km SWW Mikhajlovskoe                           | 160  | 20-21 | 7 | 2012 | R. Yakovlev, Yu. Perunov & P. Ustjuzhanin        | R.V. Yakovlev collection, Barnaul, Russia                                |
| 9155  | <i>Hyles hippophaes bienerti</i> | Kazakhstan   | S Kazakhstan, Ili river valley near Koktal bridge                                                | 510  | 1     | 7 | 2012 | S.Rybalkin & R.Yakovlev                          | R.V. Yakovlev collection, Barnaul, Russia                                |
| 9190  | <i>Hyles hippophaes bienerti</i> | Mongolia     | SW Mongolia, Hovd Aimak, Mongolian Altai (S. slope), Bulgan-Gol basin, Dood-Naryjn-Gol Valley    | 1300 | 7-8   | 7 | 2015 | R.Yakovlev                                       | R.V. Yakovlev collection, Barnaul, Russia                                |
| 9214  | <i>Hyles hippophaes bienerti</i> | Mongolia     | W Mongolia, Hovd Aimak, Dzun-Dzhargalant-Khairkhan, Ar-Shatyn-Gol river valley                   | 1200 | 26    | 6 | 2015 | R.Yakovlev                                       | R.V. Yakovlev collection, Barnaul, Russia                                |



|       |                                        |            |                                                                                               |      |       |   |      |                                |  |                                                                                                                                                    |
|-------|----------------------------------------|------------|-----------------------------------------------------------------------------------------------|------|-------|---|------|--------------------------------|--|----------------------------------------------------------------------------------------------------------------------------------------------------|
|       |                                        |            |                                                                                               | 2045 |       |   |      |                                |  | Museum für Naturkunde,<br>Leibnitz-Institut für<br>Evolutions- und<br>Biodiversitätsforschung an<br>der Humboldt-Universität zu<br>Berlin, Germany |
| 9248  | <i>Hyles hippophaes<br/>bienerti</i>   | Kyrgyzstan | Narün (Naryn) - city and river                                                                |      |       |   |      | ? Staudinger                   |  |                                                                                                                                                    |
| 9278  | <i>Hyles hippophaes<br/>bienerti</i>   | Kazakhstan | West-Kazakhstan, Ryn desert (Ryn-Kum sandy<br>steppe), 20km East from Bisen vill.             | 27   | 22    | 6 | 1999 | V. Karalius & I.<br>Miatleuski |  | Sphingidae Museum,<br>Pribram, Czech Republic                                                                                                      |
| 9279  | <i>Hyles hippophaes<br/>bienerti</i>   | Kazakhstan | European part of Kazakhstan, Ryn desert (Ryn-<br>Kum sandy steppe) NW, Urda (Orda) vill. env. | 0    | 4     | 6 | 1999 | V. Karalius & I.<br>Miatleuski |  | Sphingidae Museum,<br>Pribram, Czech Republic                                                                                                      |
| 9290  | <i>Hyles hippophaes<br/>bienerti</i>   | Tajikistan | Eastern Pamir Mts., Zulumart Mt. region                                                       | 3770 | 1-10  | 8 | 2014 | V.Gurko                        |  | Sphingidae Museum,<br>Pribram, Czech Republic                                                                                                      |
| 9291  | <i>Hyles hippophaes<br/>bienerti</i>   | Tajikistan | W. Pamir Mts., Sarez lake area                                                                | 3300 | 20-30 | 7 | 2002 | V.Gurko                        |  | Sphingidae Museum,<br>Pribram, Czech Republic                                                                                                      |
| 9318  | <i>Hyles hippophaes<br/>bienerti</i>   | China      | 30km NE of Shánshán, Xinjiang province                                                        | 510  | 21-30 | 6 | 2002 | Dr. F. Karrer                  |  | F. Karrer collection,<br>Zofingen, Switzerland                                                                                                     |
| 9319  | <i>Hyles hippophaes<br/>bienerti</i>   | China      | 30km NE of Shánshán, Xinjiang province                                                        | 510  | 21-30 | 6 | 2002 | Dr. F. Karrer                  |  | F. Karrer collection,<br>Zofingen, Switzerland                                                                                                     |
| 9320  | <i>Hyles hippophaes<br/>bienerti</i>   | China      | 30km NE of Shánshán, Xinjiang province                                                        | 510  | 21-30 | 6 | 2002 | Dr.F.Karrer                    |  | F. Karrer collection,<br>Zofingen, Switzerland                                                                                                     |
| 12622 | <i>Hyles hippophaes<br/>hippophaes</i> | Romania    |                                                                                               |      |       |   | 1793 | -                              |  | Hessisches Landesmuseum<br>für Kunst und Natur,<br>Wiesbaden, Germany                                                                              |
| 1075  | <i>Hyles livornica</i>                 | Israel     | Yotvata or Jordan: Southern Desert Wadi of<br>Jebel Surebit                                   | 950  | 12    | 9 | 1990 | leg. Müller                    |  | Bavarian State Collection of<br>Zoology, Munich, Germany                                                                                           |
| 3082  | <i>Hyles livornica</i>                 | Iran       | Semnan, 35km E Shahrud, Maymay                                                                | 1400 | 22    | 6 | 2003 | W. ten Hagen                   |  | Senckenberg Natural History<br>Collections, Dresden,<br>Germany                                                                                    |
| 11667 | <i>Hyles livornica</i>                 | Tajikistan | Tigrovaja Balka                                                                               | 600  | 22    | 6 | 1988 | O.Gorbunov                     |  | U. Eitschberger collection,<br>Marktleuthen, Germany                                                                                               |

|       |                                |             |                                                                                 |           |      |   |      |                                   |                                                   |
|-------|--------------------------------|-------------|---------------------------------------------------------------------------------|-----------|------|---|------|-----------------------------------|---------------------------------------------------|
| 11991 | <i>Hyles livornica</i>         | China       | Xinjiang, W Taklimakan desert, Yarkan He river valley, tugay forest             | 1140      | 9-12 | 6 | 2013 | Floriani                          | U. Eitschberger collection, Marktleuthen, Germany |
| 12091 | <i>Hyles livornica</i>         | Syria       | Palmyra                                                                         |           | 30   | 4 | 1995 | Rohlena Pavel                     | Sphingidae Museum, Pribram, Czech Republic        |
| 12095 | <i>Hyles livornica</i>         | Pakistan    | NWFP, S. Waziristan agency, near Tanai vill.                                    | 1500-2500 | 2-12 | 9 | 2005 | V. Gurko                          | Sphingidae Museum, Pribram, Czech Republic        |
| 9181  | <i>Hyles nicaea sheljuzkoi</i> | Mongolia    | Hovd Aimak, Mongolian Altai (S. slope) Bodonchin-Gol basin, Khondijn-Gol Valley | 1750      | 27   | 6 | 2015 | R. Yakovlev                       | R.V. Yakovlev collection, Barnaul, Russia         |
| 11565 | <i>Hyles nicaea sheljuzkoi</i> | Kazakhstan  | Boro-Khoro Mts., 35 km N of Panfilov                                            | 1800      | 2    | 7 | 2010 | S. K. Korb                        | Sphingidae Museum, Pribram, Czech Republic        |
| 12138 | <i>Hyles nicaea sheljuzkoi</i> | Turkey      | Prov. Sivas, 6km W of Gürün                                                     |           | 6-7  | 7 | 1994 | P. Gyulai                         | Sphingidae Museum, Pribram, Czech Republic        |
| 3081  | <i>Hyles nicaea sheljuzkoi</i> | Iran        | Yazd, Shir Kuh, S Deh Bala                                                      | 2700      | 4    | 7 | 2000 | leg. Schurian & ten Hagen         | -                                                 |
| 11563 | <i>Hyles nicaea sheljuzkoi</i> | Tajikistan  | Baljuan ... Wachsch m...., Sarychosor                                           | 1300      | 20   | 7 | 1999 | ex coll Aidas Saldaitis           | U. Eitschberger collection, Marktleuthen, Germany |
| 4760  | <i>Hyles nicaea sheljuzkoi</i> | Turkey      | Siras                                                                           |           | -    | - | -    | . Specimen no. BMNH 813546; NHMUK | Natural History Museum, London, United Kingdom    |
| 12722 | <i>Hyles salangensis</i>       | Afghanistan | Salang-Pass, N-Seite (Khinjan)                                                  | 2100      | 5-11 | 7 | 1966 | G. Ebert                          | Centrum für Naturkunde, Hamburg, Germany          |
| 12723 | <i>Hyles salangensis</i>       | Afghanistan | Salang-Pass S, Nv. Kabul                                                        | 2700      | 1    | 7 | 1965 | Kasy & Vartian                    | Centrum für Naturkunde, Hamburg, Germany          |
| 12724 | <i>Hyles salangensis</i>       | Afghanistan | Salang-Pass, N-side (Khinjan)                                                   | 2100      | 5-11 | 7 | 1966 | G. Ebert                          | Centrum für Naturkunde, Hamburg, Germany          |
| 12725 | <i>Hyles salangensis</i>       | Afghanistan | Provinz Kadaghan, Salang-Pass northern side                                     | 2100      | 13   | 6 | 1971 | Vartian                           | Centrum für Naturkunde, Hamburg, Germany          |
| 12726 | <i>Hyles salangensis</i>       | Afghanistan | Provinz Kadaghan, Salang-Pass northern side                                     | 2100      | 13   | 6 | 1971 | Vartian                           | Centrum für Naturkunde, Hamburg, Germany          |

|       |                          |             |                                                                                            |           |       |   |      |                                                 |                                                                       |
|-------|--------------------------|-------------|--------------------------------------------------------------------------------------------|-----------|-------|---|------|-------------------------------------------------|-----------------------------------------------------------------------|
| 12727 | <i>Hyles salangensis</i> | Afghanistan | Nord-Salang                                                                                | 2300      | 7     | 6 | 1975 | Dr. Reshöft                                     | Centrum für Naturkunde,<br>Hamburg, Germany                           |
| 12135 | <i>Hyles vespertilio</i> | Azerbaijan  | USSR, Nachicevan                                                                           |           | 1     | 7 | 1986 | -                                               | Sphingidae Museum,<br>Příbram, Czech Republic                         |
| 12136 | <i>Hyles vespertilio</i> | Georgia     | USSR, Sukhumi Region, Caucare                                                              |           | 20    | 7 | 1970 | -                                               | Sphingidae Museum,<br>Příbram, Czech Republic                         |
| 12137 | <i>Hyles vespertilio</i> | Croatia     | Dalmatien (Croatia)                                                                        |           | -     | - | 1938 | -                                               | Sphingidae Museum,<br>Příbram, Czech Republic.                        |
| 12623 | <i>Hyles vespertilio</i> | Italy       | -                                                                                          |           | -     | - | 1819 | -                                               | Hessisches Landesmuseum<br>für Kunst und Natur,<br>Wiesbaden, Germany |
| 9124  | <i>Hyles gallii</i>      | Kazakhstan  | Sarym-Sakty Mts., 12 km SSW Soldatovo vill.                                                | 1300 m    | 11-13 | 6 | 2012 | R.V. Yakovlev                                   | R.V. Yakovlev collection,<br>Barnaul, Russia                          |
| 9127  | <i>Hyles gallii</i>      | Russia      | Altaj Kraj, Mikhajlovskoe distr., 5 km SWW<br>Mikhajlovskoe                                |           | 20-21 | 7 | 2012 | R. Yakovlev, Yu.<br>Perunov & P.<br>Ustjuzhanin | R.V. Yakovlev collection,<br>Barnaul, Russia                          |
| 9128  | <i>Hyles gallii</i>      | Russia      | Magadan reg., Susuman vill.                                                                |           | 12    | 7 | 2011 | V. Zurilina                                     | R.V. Yakovlev collection,<br>Barnaul, Russia                          |
| 11089 | <i>Hyles gallii</i>      | Kyrgyzstan  | Kyrgyzstan, Lake Ortotokoi                                                                 |           | -     | 7 | 2014 | S. Yevdoshenko                                  | Senckenberg Natural History<br>Collections, Dresden,<br>Germany       |
| 11953 | <i>Hyles gallii</i>      | China       | Xinjiang, Tian Shan, Ketmen Mts. (=T ieh-mi-li-k<br>o Shan), ca. 50 km SSW Yinig ( Kuldja) | 1750-1900 | 20    | 6 | 2007 | Grieshuber                                      | U. Eitschberger collection,<br>Markt-leuthen, Germany                 |
| 11954 | <i>Hyles gallii</i>      | Mongolia    | Dornod Aimag Humrog r., 120 km E from Sumber<br>Sum                                        |           | 20    | 6 | 2004 | U. Eitschberger                                 | U. Eitschberger collection,<br>Markt-leuthen, Germany                 |

**Table S2. Conserved Specimens used for RNA bait generation.**

| MTD-TW<br>Accession No. | Taxon                     | Location   | Collection Date | Recorded by       | Tissue type<br>(conservation) |
|-------------------------|---------------------------|------------|-----------------|-------------------|-------------------------------|
| 4831                    | <i>Hyles hippophaes</i>   | Russia     | 07.2014         | Gary Saunders     | larva (EtOH)                  |
| 12014                   | <i>Hyles zygophylli</i>   | Kasachstan | 09.2014         | -                 | larva (EtOH)                  |
| 1117                    | <i>Hyles livornica</i>    | Morocco    | 05.2005         | -                 | larva (EtOH)                  |
| 11787                   | <i>Hyles euphorbiae</i>   | Kasachstan | 06.2014         | Serge Yevdoshenko | larva (EtOH)                  |
| 3917                    | <i>Hyles centralasiae</i> | Kyrgyzstan | 07.2006         | Mark O'Neill      | Imago, leg (EtOH)             |
| 5565                    | <i>Hyles euphorbiae</i>   | Iran       | 21.-24.05.2009  | Alireza Naderi    | Imago, leg (EtOH)             |
| 9316                    | <i>Hyles siehei</i>       | Turkey     | 21.6.2011       | Martin Geck       | Imago, leg (EtOH)             |

**Table S3. Accession numbers of Sanger sequences included for comparison.**

| Taxon                                      | NCBI<br>Accession<br>number | Internal ID                 | Collection data of new<br>samples | Voucher deposition<br>of new samples |
|--------------------------------------------|-----------------------------|-----------------------------|-----------------------------------|--------------------------------------|
| <i>Hyles vespertilio</i>                   | FN386605                    | MTD-TW 628                  | n.a.                              | n.a.                                 |
| <i>Hyles vespertilio</i>                   | AJ749445                    | (BMNH) 0007,<br>MTD-TW 4336 | n.a.                              | n.a.                                 |
| <i>Hyles vespertilio</i>                   | AJ749446                    | (BMNH) 0114,<br>MTD-TW 4351 | n.a.                              | n.a.                                 |
| <i>Hyles<br/>hippophaes<br/>hippophaes</i> | AJ749452                    | BMNH 695817,<br>MTD-TW 4223 | n.a.                              | n.a.                                 |
| <i>Hyles<br/>hippophaes<br/>bienerti</i>   | FN386565                    | MTD-TW 501                  | n.a.                              | n.a.                                 |
| <i>Hyles<br/>hippophaes<br/>bienerti</i>   | FN386567                    | MTD-TW 1317                 | n.a.                              | n.a.                                 |
| <i>Hyles<br/>hippophaes<br/>bienerti</i>   | FN386569                    | MTD-TW 3458                 | n.a.                              | n.a.                                 |
| <i>Hyles<br/>hippophaes</i>                | FN386570                    | MTD-TW 3459                 | n.a.                              | n.a.                                 |

*bienerti*

|                                    |          |                          |                                                                                         |                                                                     |
|------------------------------------|----------|--------------------------|-----------------------------------------------------------------------------------------|---------------------------------------------------------------------|
| <i>Hyles hippophaes bienerti</i>   | FN386566 | MTD-TW 1316              | n.a.                                                                                    | n.a.                                                                |
| <i>Hyles hippophaes bienerti</i>   | ###      | MTD-TW 3209              | Russia, Saratov Province, nearby Engels city, leg. V. Anikin, 12.VIII 2007              | Museum Witt München                                                 |
| <i>Hyles hippophaes bienerti</i>   | ###      | MTD-TW 3086              | Turkey, Adana Pozanti, 900m, leg. W. ten Hagen, 28.VII.1993                             | private collection Dr. W. ten Hagen (Mömlingen)                     |
| <i>Hyles hippophaes bienerti</i>   | ###      | MTD-TW 3087              | Iran, Qom Kuh-e Goran (South side), 2450m, leg. W. ten Hagen, 20/21.VII.1998            | private collection Dr. W. ten Hagen (Mömlingen)                     |
| <i>Hyles hippophaes baltistana</i> | ###      | MTD-TW 6631              | North India, Spiti, Himal Pradesh, Himalaya, leg. H. Harbich, 1995                      | Museum of Zoology, Senckenberg Dresden (Heimo Harbich's collection) |
| <i>Hyles hippophaes baltistana</i> | ###      | MTD-TW 6632              | North India, Spiti, Himal Pradesh, Himalaya, leg. H. Harbich, 1995                      | Museum of Zoology, Senckenberg Dresden (Heimo Harbich's collection) |
| <i>Hyles chamyla f. chamyla</i>    | ###      | MTD-TW 1725, BC-RBP 2279 | Mongolia, Gobi Altay, Zahuin Gobi, Aimak, 1090 m, leg. Saldaitis, Jun-06-2004           | private collection Dr. Ronald Brechlin (Pasewalk)                   |
| <i>Hyles chamyla f. chamyla</i>    | ###      | MTD-TW 1726, BC-RBP 2280 | Mongolia, Gobi Altay, Zahuin Gobi, Aimak, 1090 m, leg. Saldaitis, Jun-06-2004           | private collection Dr. Ronald Brechlin (Pasewalk)                   |
| <i>Hyles chamyla f. apocyni</i>    | ###      | MTD-TW 1325              | Tadzhikistan, down stream Pianj R., "Tigrovaya balka" Reserve, V. Gurko, 1.-5.VIII.2006 | collection V. Gurko                                                 |
| <i>Hyles chamyla f. apocyni</i>    | ###      | MTD-TW 1326              | Tadzhikistan, down stream Pianj R., "Tigrovaya balka" Reserve, V. Gurko, 1.-5.VIII.2006 | collection V. Gurko                                                 |

---

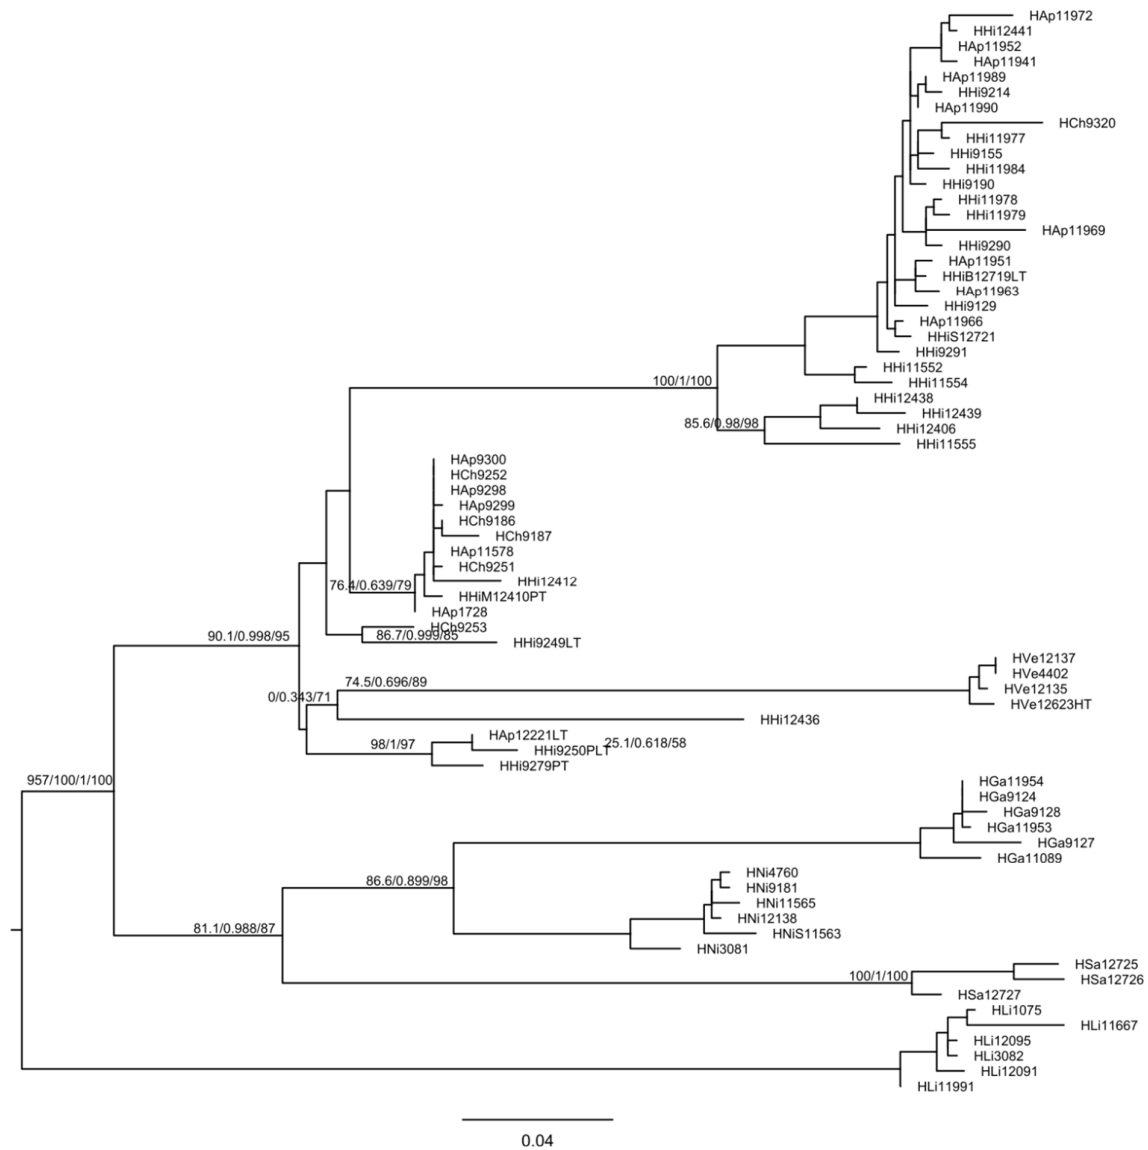

**Figure S4. Maximum Likelihood tree based on 298 parsimony-informative mitochondrial SNPs of the *H. hippophaes* species cluster and *Hyles* outgroups.** Node support values from left to right are ML bootstrap, Bayesian-like posterior probability, and parsimony bootstrap. Bootstrap support values are based upon 10000 ultra-fast bootstraps. The tree is unrooted but was rooted at the midpoint for illustration purposes. Two specimens with the highest missingness were deleted (*H. h. hippophaes* holotype, 51.75% and *H. h. bienerti* paratype, 29.53%).

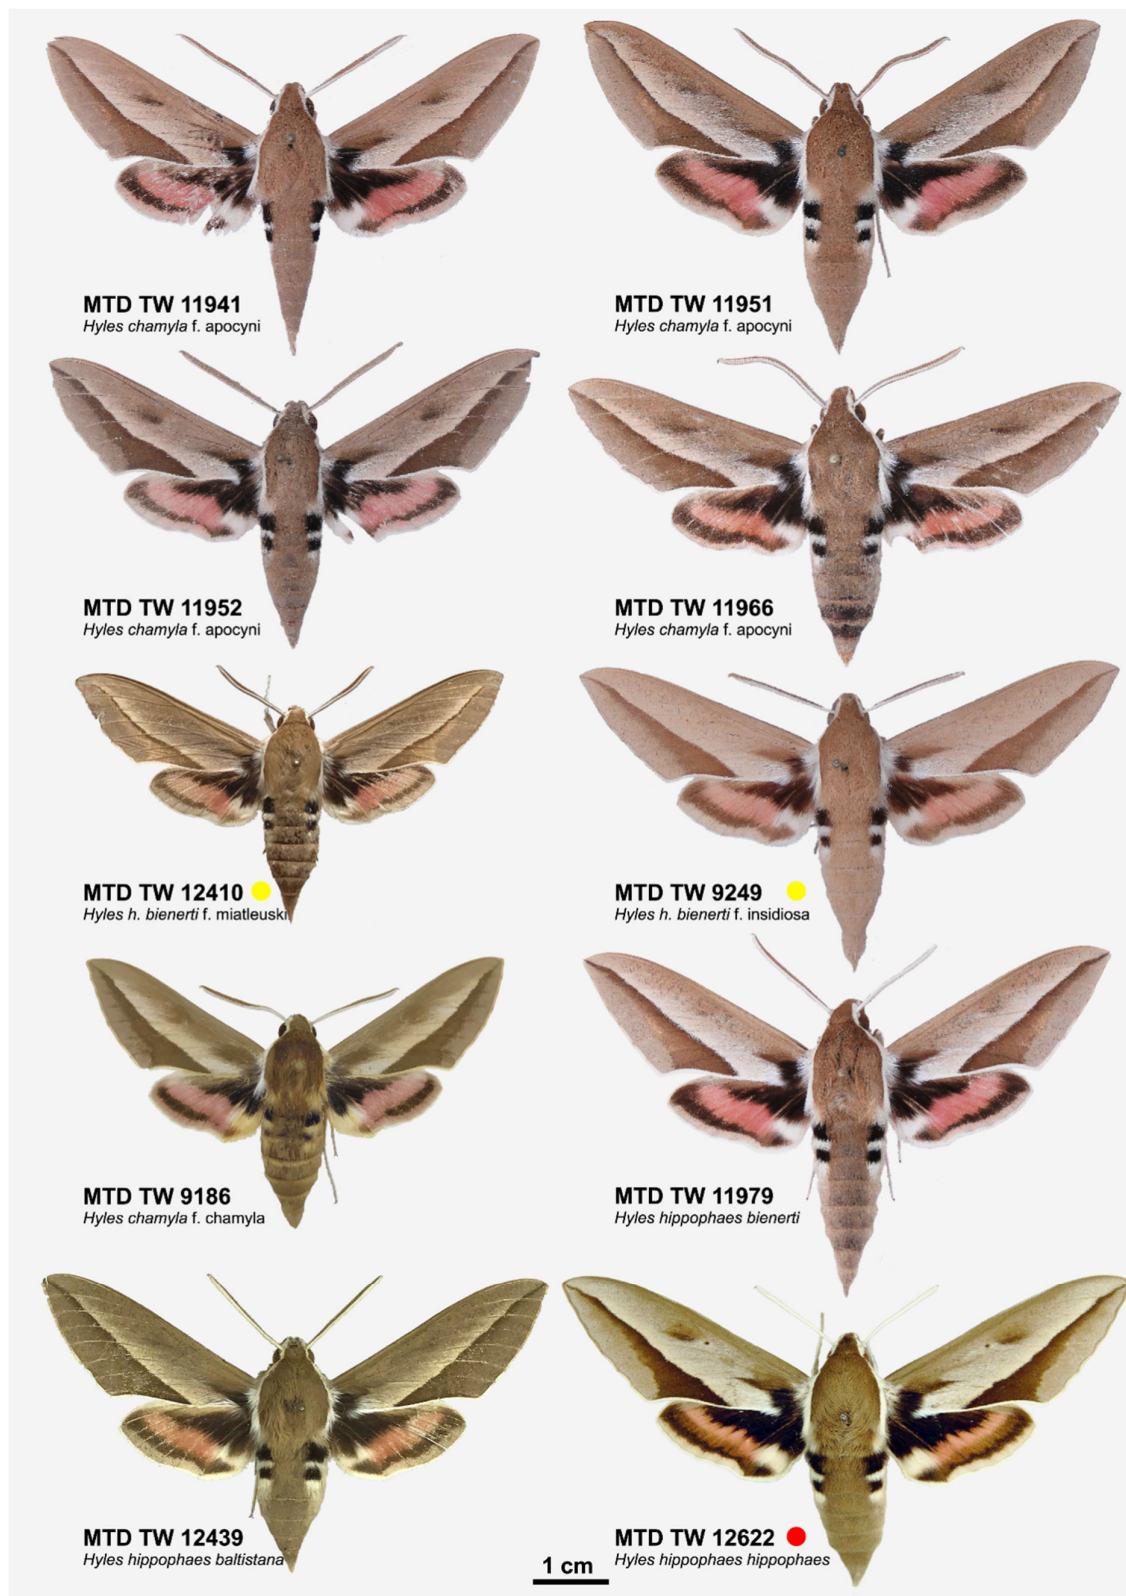

**Figure S5. Habitus of specimens showing conflicting assignment according to mtDNA vs phenotype data, alongside typical phenotypes of known taxa.** Voucher-codes and taxon names as in Figures 6, 8 and Table S1. Most such specimens correspond to the likely hybrid '*Hyles chamyla* f. *apocyni*'. Red dots mark holotypes, while yellow dots mark para- and lectotypes.
